# Supplementary material for: Nanoparticle rearrangement under stress in networks of cellulose nanofibrils using in situ SAXS during tensile testing
Source: Royal Society of Chemistry journal article supplement (doi:10.1039/c9nr10964a), 2020-01-01
Supplement: c9nr10964a1.pdf [file c9nr10964a1.pdf]

# **Electronic supplementary information ESI:**

## **Nanoparticle Rearrangement Under Stress in Cellulose Nanofibrils Networks using *in situ* SAXS During Tensile Testing**

J. Engström,<sup>a,b‡</sup> A. Jimenez,<sup>c‡</sup> and E. Malmström<sup>a,b\*</sup>

<sup>a</sup> *KTH Royal Institute of Technology, School of Chemistry, Biotechnology and Health, Department of Fibre and Polymer Technology,*

<sup>b</sup> *Wallenberg Wood Science Centre, SE-100 44, Stockholm, Sweden*

<sup>c</sup> *Department of Chemical Engineering, Columbia University,*

<sup>‡</sup>*J.E. and A.J. contributed equally to the work*

<sup>\*</sup> *Corresponding author e-mail: [mavem@kth.se](mailto:mavem@kth.se)*

**Keywords:** PISA, latex, Nanocomposites, Cellulose nanofibrils, SAXS.

## Ex Situ Tensile Testing

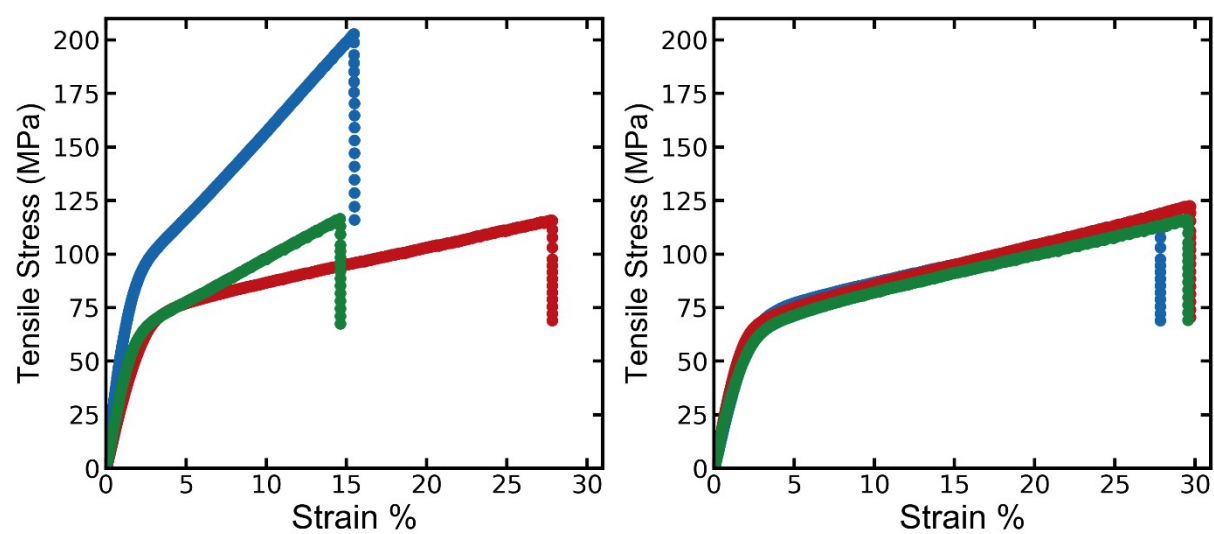

**Figure S1:** Representative curves from *ex situ* tensile testing of (A) CNF reference (blue), CNF-PMMA<sub>100</sub> (red), and CNF-PBMA<sub>82</sub> (green). (B) Three consecutive tests of CNF-PMMA<sub>100</sub>.

SEM of CNF-PBMA<sub>82</sub>

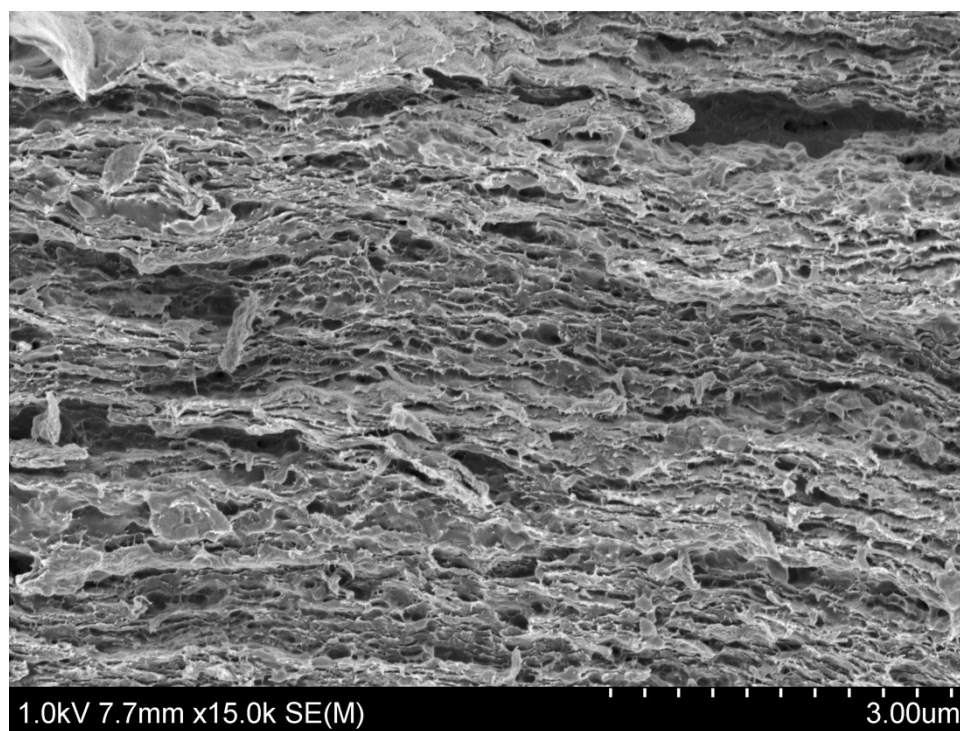

**Figure S2:** SEM image of cross-section from tensile testing of a composite CNF-PBMA<sub>82</sub> treated only at room temperature.

## Form Factor SAXS

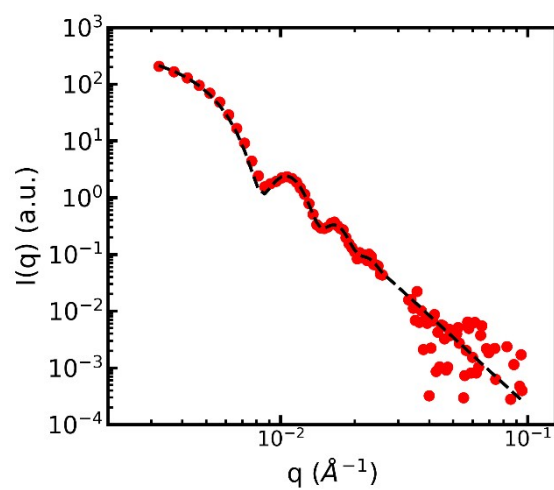

**Figure S3:** SAXS form factor of PMMA<sub>100</sub> NPs in dilute aqueous solution. SAXS was performed on the Columbia SAXSLAB equipment and background subtracted. The pattern was fit with a spherical form factor with a radius of 52 nm and a polydispersity of 0.09.

## SAXS on 40nm NP Composites

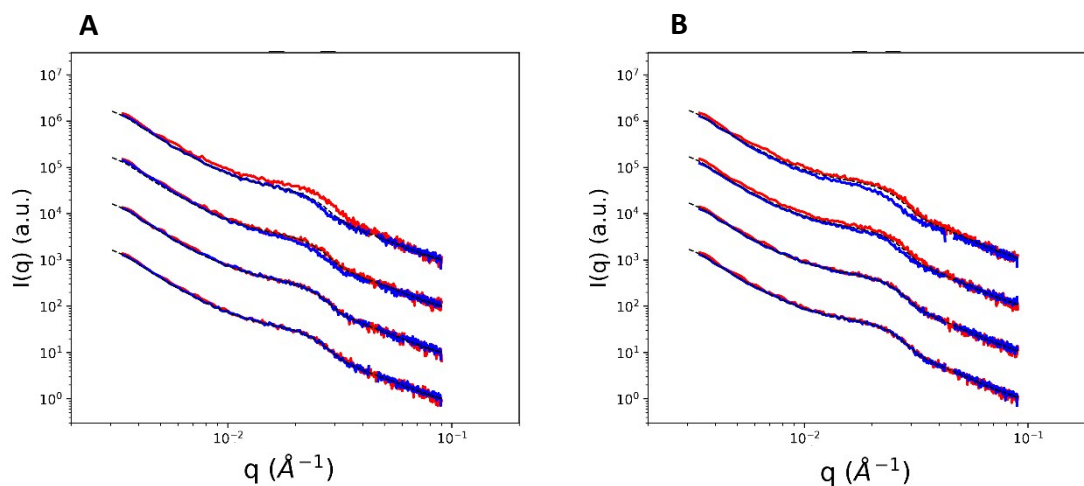

**Figure S4:** SAXS performed on the (A) CNF-PMMA<sub>40</sub> and (B) CNF-PBMA<sub>40</sub> composites during in situ strain at 20% RH at 0, 25, 50, and 95% strain before failure for increasing intensities (2D SAXS curved integrated (blue) vertically and (red) horizontally integrated). Just before fracture, a small degree of anisotropy can be seen around the form factor range of the NPs. The low  $q$  range, however, maintains the upturn in intensity with a fractal dimension close to 3 with no apparent anisotropy along this length scale.

## Ultra-Small Angle X-ray Scattering

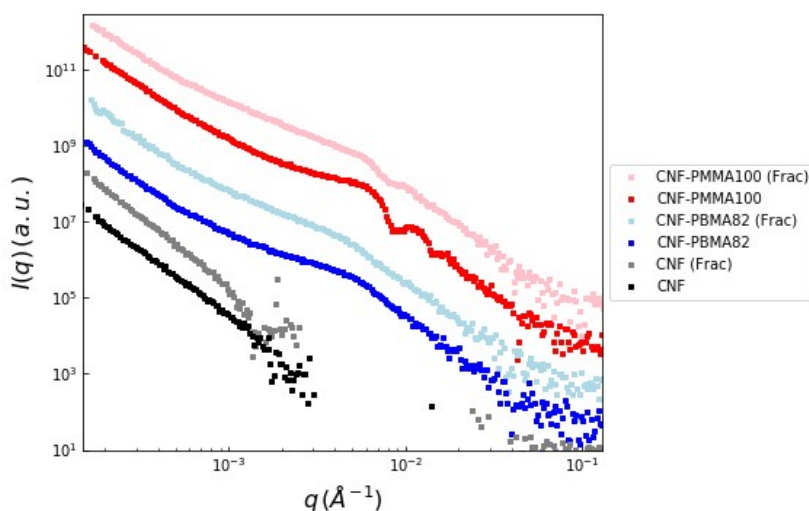

**Figure S5:** Ultra small angle x-ray scattering performed on CNF, CNF-PMMA<sub>100</sub>, and CNF-PBMA<sub>82</sub> before and after strain to failure (“Frac”). The smearing of the pattern in the form factor region of the sample is similar to that seen in the *in situ* scattering. The lack of structural anisotropy at low  $q$  is noted, down to  $\sim 4$  micron, for this radially averaged measurement.

## Wide Angle X-ray Scattering

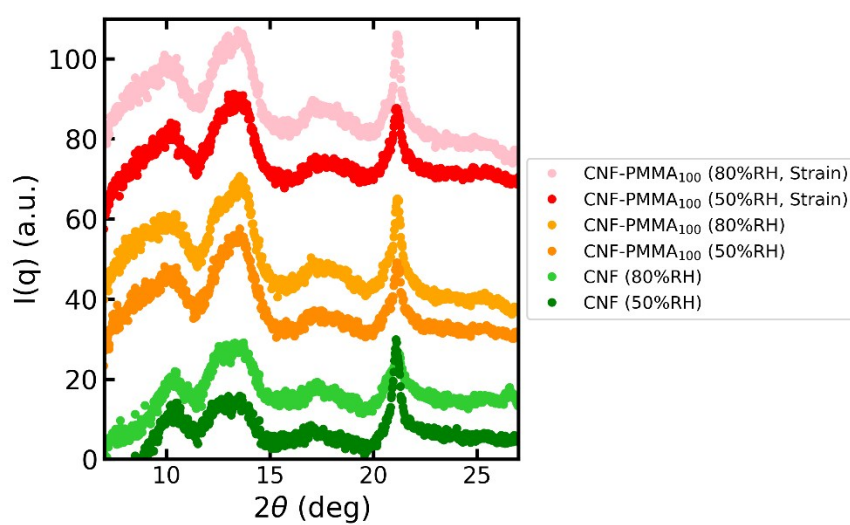

**Figure S6:** Wide angle X-ray scattering performed on CNF and CNF-PMMA<sub>100</sub> at different humidities and under in situ strain.

## SAXS Fits

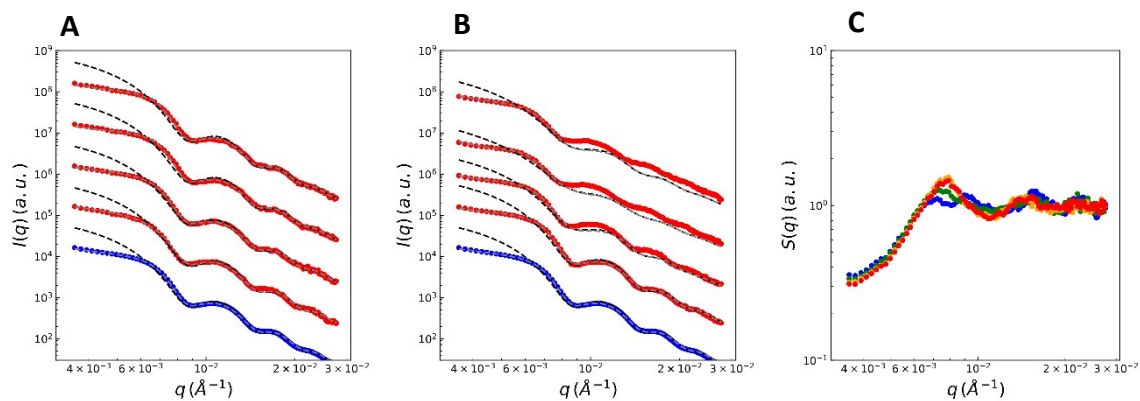

**Figure S7:** Fitting of the SAXS data for CNF-PMMA<sub>100</sub> sample for in situ strain at 50% humidity integrated (A) vertically and (B) horizontally. Blue curves are integrated isotropically. Black dashed lines are form factor fits of the NPs. Grey dashed lines are fits incorporating a Percus-Yevick structure factor. Dividing the data in (A) by the form factor gives (C) the structure factor of the NP scattering.
